# Supplementary material
Source: ML conference proceedings conference paper supplement (https://openreview.net/forum?id=KMaI40_UaGw)
Supplement: supplementary_material [file attachment]

## A Proofs from Section 2.3

*Proof of Lemma 2.4.* Consider the optimal fractional assignment  $\mathbf{X}^*$  for  $\mathcal{I}$ ; for a machine  $i$ , let the load on this machine be  $\lambda$ . Now using the same assignment for the random sample  $\mathcal{I}_\delta$  gives an expected load of  $\mu := \delta\lambda$  on machine  $i$ , and the probability that this load deviates from the expectation by  $\gamma := \max(\varepsilon\mu, k)$  is at most

$$2 \exp\left(-\frac{\gamma^2}{2\mu + \gamma}\right).$$

Suppose  $\varepsilon\mu > k$  where  $k = O(\varepsilon^{-1} \log m)$ , this quantity is at most

$$2e^{-\varepsilon^2\mu/3} \leq 2e^{-\varepsilon^k/3} \leq 1/\text{poly}(m).$$

Else  $k \geq \varepsilon\mu$ , and so the probability is at most

$$2e^{-\varepsilon k} \leq 1/\text{poly}(m).$$

This proves the lemma.  $\square$

## B Proofs from Section 2.5

*Proof of Lemma 2.6.* By induction on  $t$ ; for  $t = 0$  the value  $D_v^t = 0$  and the claims are vacuously true. Hence we consider iteration  $t \geq 1$  that generates  $\theta_t$  from  $\theta_{t-1}$ , and look at two cases.

*Case 1:*  $D_v^t = D_v^{t-1}$ . Since the algorithm did not update the weight for machine  $i$  in iteration  $t$ , we must have had  $\widehat{X}_v^{t-1} \leq (1 + \varepsilon)^4 \cdot \widehat{Z}$ . By the estimation guarantee,  $\widehat{X}_v^{t-1} \geq (1 + \varepsilon)^{-1} X_v^{t-1}$  and  $\widehat{Z} \leq (1 + \varepsilon)\gamma$ , so  $X_v^{t-1} \leq (1 + \varepsilon)^6 \gamma$ . Since all weights are non-increasing and change by at most a  $(1 + \varepsilon)$  factor, the new load  $X_v^t \leq (1 + \varepsilon) X_v^{t-1}$ —at worst, the weight for machine  $v$  may remain the same whereas weights for other machines may decrease. Thus  $X_v^t \leq (1 + \varepsilon)^7 \gamma$ . This proves the second claim.

For the first claim, if  $D_v^t > 0$  then  $D_v^{t-1} = D_v^t$  means we can use the induction hypothesis to infer  $X_v^{t-1} \geq (1 + \varepsilon)\gamma$ . Moreover,  $X_v^t \geq X_v^{t-1}$ , since  $\theta_v^t = \theta_v^{t-1}$  and all other weights are non-increasing. So we have  $X_v^t \geq (1 + \varepsilon)\gamma$ .

*Case 2:*  $D_v^t = D_v^{t-1} + 1$ . Since the algorithm updated the weight,  $\widehat{X}_v^{t-1} > (1 + \varepsilon)^4 \widehat{Z}$ . From the estimation guarantee, we have  $\widehat{Z} \geq (1 + \varepsilon)^{-1} \gamma$ , and in particular,  $\widehat{Z} \geq (1 + \varepsilon)^{-1} k$ . This gives  $\widehat{X}_v^{t-1} \geq (1 + \varepsilon)^3 k$ . The estimation guarantee now means that  $\max(X_v^{t-1}, k) = X_v^{t-1}$ , since otherwise we would have  $\widehat{X}_v^{t-1} \leq (1 + \varepsilon)k$ . Moreover, the estimation guarantee says  $X_v^{t-1} \geq \widehat{X}_v^{t-1}(1 + \varepsilon)^{-1}$ , so combining the above facts we get  $X_v^{t-1} \geq (1 + \varepsilon)^2 \gamma$ . Since the weight  $\theta_v^t$  decreases by a factor of at most  $(1 + \varepsilon)$ , while other weights are non-increasing, we have  $X_v^t \geq (1 + \varepsilon)\gamma$ , which proves the first claim.

For the second claim, if  $D_v^t < t$ , then  $D_v^{t-1} < t - 1$ . By the induction hypothesis,  $X_v^{t-1} \leq (1 + \varepsilon)^7 \gamma$ . Furthermore,  $X_v^t \leq X_v^{t-1}$  (since we decreased the weight for machine  $v$  by  $(1 + \varepsilon)$ ), and at worst the weights of all the other machines can decrease by the same amount, so  $X_v^t \leq (1 + \varepsilon)^7 \gamma$  as desired.  $\square$

*Proof of Lemma 2.7.* Since  $D_v^t \geq s > 0$  for all  $v \in A$ , we have  $X_v^t \geq (1 + \varepsilon)\gamma$  by Lemma 2.6. Thus, it follows that

$$\sum_{v \in A} X_v^t \geq (1 + \varepsilon)|A| \cdot \gamma.$$

Let  $x_{ev}^t$  denotes the load that job  $e$  puts on machine  $v$  using weights  $\theta^t$ ; that is,

$$x_{ev}^t = \frac{\theta_v^t}{\sum_{u \in e} \theta_u^t} \cdot \mathbf{1}_{(v \in e)}.$$

This implies that the load  $X_v^t = \sum_e x_{ev}^t$ . We can now rewrite the LHS as

$$\sum_{v \in A} X_v^t = \sum_{v \in A} \sum_{e \subseteq B} x_{ev}^t + \sum_{v \in A} \sum_{e \not\subseteq B} x_{ev}^t. \quad (5)$$

For a fixed job/edge  $e \ni v$  with  $e \not\subseteq B$ , it follows that there exists a machine  $w \in e$  with  $D_w^t < s - \alpha$ . Since  $D_v^t \geq s$ , we have

$$x_{ev}^t = \frac{\theta_v^t}{\sum_{u \in e} \theta_t(u)} \leq \frac{\theta_v^t}{\theta_w^t} \leq \frac{(1 + \varepsilon)^{-s}}{(1 + \varepsilon)^{-(s - \alpha)}} = (1 + \varepsilon)^{-\alpha} = \frac{\varepsilon}{2m}.$$

Each of  $m$  machines has load at most  $\text{FOpt}(\mathcal{I})$ , so there are at most  $m \text{FOpt}(\mathcal{I})$  edges. In particular,  $\deg(v) \leq m \text{FOpt}(\mathcal{I})$  for all machines  $v$ , and so it follows that

$$\sum_{v \in A} \sum_{e \not\subseteq B} x_{ev}^t \leq \sum_{v \in A} \frac{\varepsilon}{2} \cdot \text{FOpt}(\mathcal{I}) = \frac{\varepsilon}{2} \cdot |A| \cdot \text{FOpt}(\mathcal{I}). \quad (6)$$

Subtracting (6) from (5),

$$\sum_{v \in A} \sum_{e \subseteq B} x_{ev}^t \geq \left(1 + \frac{\varepsilon}{2}\right) |A| \cdot \text{FOpt}(\mathcal{I}). \quad (7)$$

Finally, we have

$$\sum_{v \in B} \sum_{e \subseteq B} x_{ev}^t = |\{e \in E \mid e \subseteq B\}| \leq |B| \cdot \text{FOpt}(\mathcal{I}),$$

where the second inequality uses that the optimal value is the density of the densest sub-hypergraph. Combining this with (7), we get

$$|B| \cdot \text{FOpt}(\mathcal{I}) \geq \sum_{v \in B} \sum_{e \subseteq B} x_{ev}^t \geq \sum_{v \in A} \sum_{e \subseteq B} x_{ev}^t \geq \left(1 + \frac{\varepsilon}{2}\right) |A| \cdot \text{FOpt}(\mathcal{I}),$$

which yields our desired claim when divided by  $\text{FOpt}(\mathcal{I})$ .  $\square$

If  $d$  is an upper bound on the *degree* of any machine, i.e., the maximum number of jobs that go to any machine, then the same argument shows that it suffices to set  $\alpha = \frac{\ln 2d / (\varepsilon \text{FOpt}(\mathcal{I}))}{\ln(1 + \varepsilon)}$ , or the weaker bound of  $\alpha = \frac{\ln 2d / \varepsilon}{\ln(1 + \varepsilon)}$ .

## C A Concentration Bound

**Theorem C.1** (Concentration Bound). *Let  $X_1, X_2, \dots, X_n$  be independent random variables taking values in  $[0, 1]$ . Let  $X := \sum_{i=1}^n X_i$ ,  $\mu = \mathbb{E}[X]$  and  $U \geq \mu$ . For every  $\delta > 0$ , we have*

$$\Pr[X > (1 + \delta)U] \leq \Pr[X > \mu + \delta U] < \left(\frac{e^\delta}{(1 + \delta)^{1 + \delta}}\right)^U \leq e^{-(\delta^2 U) / (2 + \delta)},$$

and

$$\Pr[X < \mu - \delta U] < e^{-\delta^2 U / 2}.$$

## D Proofs for Related Machines

In the related machines setting, recall that each machine  $v$  has a *speed*  $s_v \geq 1$ , and the load of a machine is the total volume  $\sum_e x_{ev}$  assigned to it, divided by the speed. So the goal is to minimize  $\max_v (\sum_e x_{ev} / s_v)$ . Again, each job can only be assigned to a subset of machines. Keeping the same notation, the machines form a set  $V$  of vertices, and the jobs are hyperedges denoting which machines they can be assigned to.

**Lemma D.1** (Proportional Assignment for Related Machines). *There exist weights  $\theta \in \mathbb{R}^m$  such that the scaled proportional allocation*

$$x_{ev} := s_v \cdot \frac{\theta_v}{\sum_{u \in e} \theta_u} \cdot \mathbf{1}_{(v \in e)}$$

*gives a near-optimal fractional load.*

*Proof.* Consider the convex program

$$\begin{aligned} \max \quad & \sum_{e,v} (x_{ev} \log(x_{ev}/s_v) - x_{ev}) \\ \sum_{v \in E} \quad & x_{ev} = 1 & \forall e \in E \\ \sum_{e:v \in e} \quad & x_{ev} \leq L s_i & \forall v \in V \\ & x_{ev} \geq 0 & . \end{aligned}$$

Now the KKT condition for this implies that

$$\log(x_{ev}/s_v) = -\lambda_v + \mu_e + \nu_{ev}.$$

Now using complementary slackness gives us for each  $v \in e$ ,

$$x_{ev} = s_v \cdot \frac{e^{-\lambda_v}}{\sum_{u \in e} e^{-\lambda_u}}.$$

Setting  $\theta_v = \exp(-\lambda_v)$  completes the proof.

Another intuitive way of seeing is to imagine splitting each machine of speed  $s_v$  into  $s_v \cdot M$  unit-speed copies for some very large  $M$ . (This factor of  $M$  is handle divisibility issues, where  $s_v$  values are not integers.) The optimal fractional assignment for this old related machines instance and this new unit-speed instance correspond to each other, up to scaling by a factor of  $M$  (and the small additional loss due to divisibility issues, which we put aside for now). Given an optimal weight vector for this unit-speed setting, all the copies of the same original machine can be assumed to have the same weight (by symmetry), and hence the total amount of job  $e$  going on copies of machine  $v$  becomes the expression above.  $\square$

**Bounding Width.** Given any related machines instance  $\mathcal{I}$ , for each job  $e$  define a new job

$$e' := \{v' \in e \mid s_{v'} \geq (\varepsilon/m) \cdot \max_{v \in e} s_v\}.$$

Let  $\mathcal{I}'$  be the instance with just these new jobs; by definition  $\frac{\max_{v \in e'} s_v}{\min_{v \in e'} s_v} \leq (m/\varepsilon)$  for all  $e' \in \mathcal{I}'$ .

**Lemma D.2.**  $\text{FOpt}(\mathcal{I}) \leq \text{FOpt}(\mathcal{I}') \leq (1 + \varepsilon) \text{FOpt}(\mathcal{I})$ .

*Proof.* Since we constrain each job to go on a subset of its original set of machines, the optimal load can only increase. But by how much? Fix any fractional assignment  $\mathbf{X}$  for  $\mathcal{I}$ . Consider any machine  $v$  and consider any job  $e$  for which this is the fastest machine in  $e$ . (Break ties arbitrarily.) Let  $e'$  be the new version of  $e$  as above: let  $\delta_e = \sum_{u \in e \setminus e'} x_{eu}$  be the volume of  $e$  going to machines that are not allowed any more in  $e'$ : move all this volume to  $v$ . I.e., set  $x'_{e'v} = x_{ev} + \delta_e$  for this fastest machine,  $x'_{e'u} = x_{eu}$  for all  $u \in e', u \neq v$ . Now the total load for  $v$  increases by at most

$$(1/s_v) \cdot \sum_{e:v = \arg \max_{u \in e} \{s_u\}} \delta_e.$$

This sum is at most the total volume of jobs assigned to machines that are slower than  $v$  by a factor  $m/\varepsilon$ . There are  $m$  such machines, and each has load at most  $\text{FOpt}(\mathcal{I})$ , so the total increase in the load for  $v$  is at most  $(\varepsilon/m) \cdot m \cdot \text{FOpt}(\mathcal{I})$ , as claimed.  $\square$
